# Supplementary material
Source: publisher figshare collection journal article supplement (https://frontiersin.figshare.com/ndownloader/files/15670313)
Supplement: Supplementary file [file 15670313]

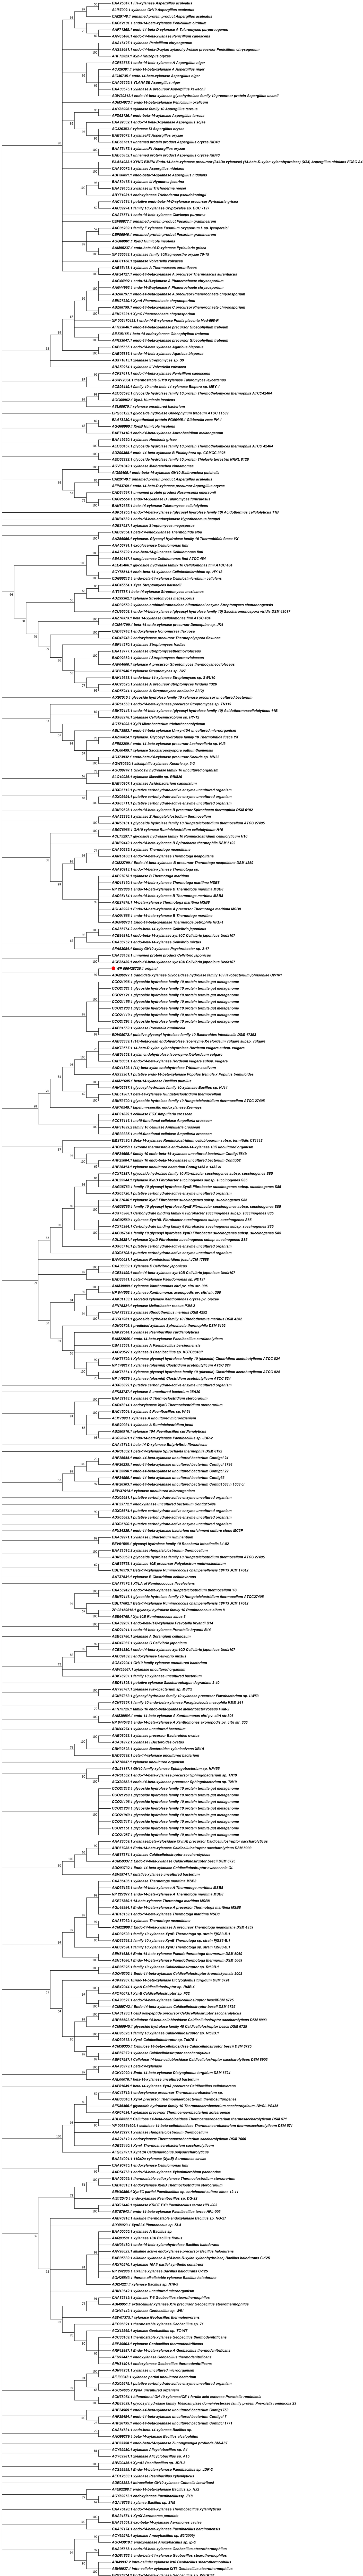



Figure S1. Evolutionary relationships between XynSPP2 and 320 amino acid sequences of characterized GH10 xylanases. The analysis Evolutionary analyses were conducted in MEGA7. The phylogenetic tree was constructed using the Neighbor-Joining method. The xylanases are represented by their relevant GenBank accession numbers. The number of times each branch is shown as a percentage. The percentage (shown next to the branches) of replicate trees was supported from 1000 bootstraps.
